# Supplementary material for: Relationship between Altered miRNA Expression and DNA Methylation of the DLK1-DIO3 Region in Azacitidine-Treated Patients with Myelodysplastic Syndromes and Acute Myeloid Leukemia with Myelodysplasia-Related Changes
Source: MDPI journal article supplement (doi:10.3390/cells7090138), 2018-09-14
Supplement: s1 [file s1]

## SUPPLEMENTARY MATERIAL

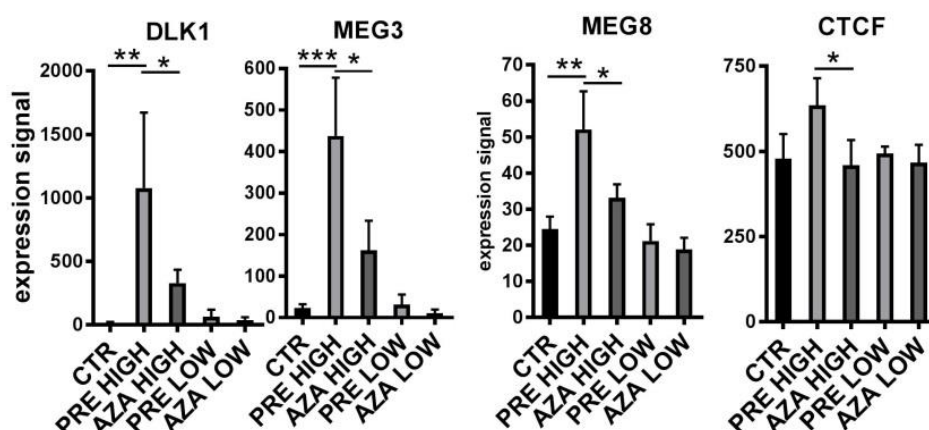

**Figure S1.** Expression of genes within the *DLK1–DIO3* region. The patient samples were divided according to miRNA expression and treatment status into four groups: PRE HIGH - untreated patients with high miRNA levels, AZA HIGH—AZA-treated patients with high miRNA levels, PRE LOW—untreated patients with low miRNA levels, AZA LOW—AZA-treated patients with low miRNA levels; CTR—controls. \* $p < 0.05$ , \*\* $p < 0.01$ , \*\*\* $p < 0.001$ .

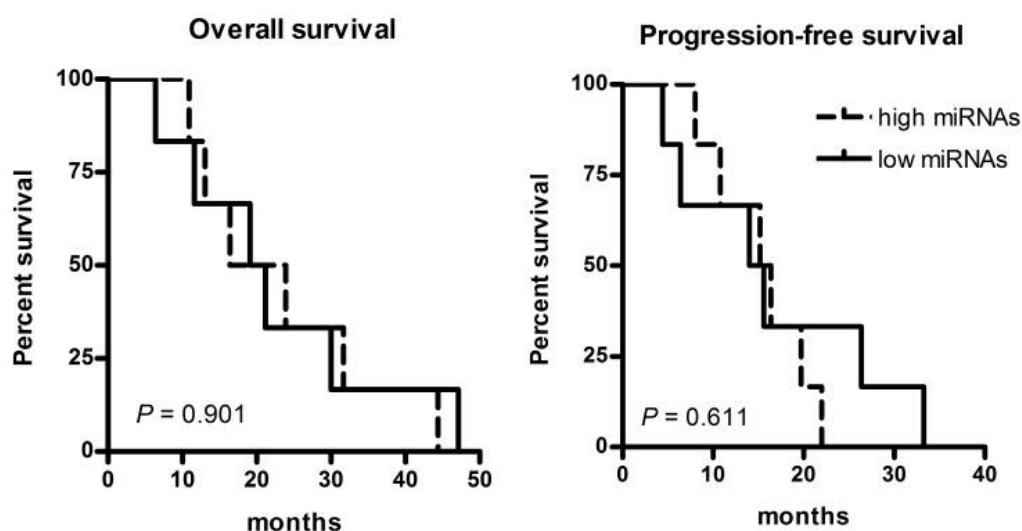

**Figure S2.** Overall survival (A) and progression-free survival (B) of MDS/AML-MRC patients after the initiation of AZA therapy according to pretreatment levels of 14q32 miRNAs.

**Table S1.** Patient characteristics.

| <b>Number of Patients</b>               | <b>12</b>       |
|-----------------------------------------|-----------------|
| Age (years), mean (range)               | 69 (63–82)      |
| Sex, female/male                        | 6/6             |
| Marrow blasts (%), mean (range)         | 18 (4–27)       |
| Karyotype, normal/abnormal              | 3/9             |
| Diagnosis, MLD/EB1/EB2/AML-MRC          | 1/1/5/5         |
| IPSS, int-1/int-2/high                  | 1/2/9           |
| AZA cycles administered, median (range) | 16 (4–34)       |
| Response, responders/nonresponders      | 7/5             |
| Follow-up (months), median (range)      | 25.4 (7.4–94.9) |

**Table S2.** List of primers used for the generation of amplicons for bisulfite sequencing. Positions of amplicons on chr14 were defined according to the publication by Manodoro *et al.* [24] using genome assembly GRCh37/hg19.

| Amplicon | Primer | Sequence                           | Position                          | Length | Regulatory Elements                                                          | CpG Density | Methylation Status in APL [24]                                            |
|----------|--------|------------------------------------|-----------------------------------|--------|------------------------------------------------------------------------------|-------------|---------------------------------------------------------------------------|
| A1       | Fwd    | AAGTAGGATTGGAAGGTTTTTA<br>GG       | chr14:101,290,069-<br>101,290,515 | 447    | - regulator binding sites: CTCF,<br>OLF-1                                    | 0.30        | hypermethylation<br>(CpGs 127-421, incl. CTCF binding site)               |
|          | Rev    | ACAACCCACAAAAACATAAATT<br>AA       |                                   |        |                                                                              |             |                                                                           |
| A2       | Fwd    | GTATTTTATTTGAGGTTTGGGGTT<br>T      | chr14:101,290,455-<br>101,290,946 | 492    | - CpG island<br>- regulator binding sites: NFYA,<br>RFX5, SP1                | 0.61        | hypermethylation<br>(whole region)                                        |
|          | Rev    | CACCCCTTTACAACCTATAAAA<br>CT       |                                   |        |                                                                              |             |                                                                           |
| A3       | Fwd    | TATTTTGGTTAAGGTGGAGGAA<br>G        | chr14:101,291,767-<br>101,292,194 | 428    | - CpG island<br>- regulator binding sites: CTCF,<br>RBL2, POLR2A, CREB, PAX3 | 0.74        | hypermethylation<br>(CpGs 25-127 and 278-332, incl. CTCF<br>binding site) |
|          | Rev    | CCAAACAAAATAAATTCAAACAC<br>AATATAT |                                   |        |                                                                              |             |                                                                           |

**Table S3.** Matrix showing pairwise correlations between expression of mRNAs/miRNAs and methylation of CpG sites. Pearson correlation coefficients are provided for each pair of variables. Significant positive correlations are highlighted in a yellow-red scale, and significant negative correlations are shown in a blue scale as indicated at the top of the table. The table is accessible in a separate file at a higher resolution.

|  |  | D |  | E |  | F |  | G |  | H |  | I |  | J |  | K |  | L |  | M |  | N |  | O |  | P |  | Q |  | R |  | S |  | T |  | U |  | V |  | W |  | X |  | Y |  | Z |  | AA |  | AB |  | AC |  | AD |  | AE |  | AF |  | AG |  | AH |  | AI |  | AJ |  | AK |  | AL |  | AM |  | AN |  | AO |  | AP |  | AQ |  | AR |  | AS |  | AT |  | AU |  | AV |  | AW |  | AX |  | AY |  | AZ |  | BA |  | BB |  | BC |  | BD |  | BE |  | BF |  | BG |  | BH |  | BI |  | BJ |  | BK |  | BL |  | BM |  | BN |  | BO |  | BP |  | BQ |  | BR |  | BS |  | BT |  | BU |  | BV |  | BW |  | BX |  | BY |  | BZ |  | CA |  | CB |  | CC |  | CD |  | CE |  |
|--|--|---|--|---|--|---|--|---|--|---|--|---|--|---|--|---|--|---|--|---|--|---|--|---|--|---|--|---|--|---|--|---|--|---|--|---|--|---|--|---|--|---|--|---|--|---|--|----|--|----|--|----|--|----|--|----|--|----|--|----|--|----|--|----|--|----|--|----|--|----|--|----|--|----|--|----|--|----|--|----|--|----|--|----|--|----|--|----|--|----|--|----|--|----|--|----|--|----|--|----|--|----|--|----|--|----|--|----|--|----|--|----|--|----|--|----|--|----|--|----|--|----|--|----|--|----|--|----|--|----|--|----|--|----|--|----|--|----|--|----|--|----|--|----|--|----|--|----|--|----|--|----|--|----|--|----|--|----|--|----|--|
|  |  | D |  | E |  | F |  | G |  | H |  | I |  | J |  | K |  | L |  | M |  | N |  | O |  | P |  | Q |  | R |  | S |  | T |  | U |  | V |  | W |  | X |  | Y |  | Z |  | AA |  | AB |  | AC |  | AD |  | AE |  | AF |  | AG |  | AH |  | AI |  | AJ |  | AK |  | AL |  | AM |  | AN |  | AO |  | AP |  | AQ |  | AR |  | AS |  | AT |  | AU |  | AV |  | AW |  | AX |  | AY |  | AZ |  | BA |  | BB |  | BC |  | BD |  | BE |  | BF |  | BG |  | BH |  | BI |  | BJ |  | BK |  | BL |  | BM |  | BN |  | BO |  | BP |  | BQ |  | BR |  | BS |  | BT |  | BU |  | BV |  | BW |  | BX |  | BY |  | BZ |  | CA |  | CB |  | CC |  | CD |  | CE |  |
|  |  | D |  | E |  | F |  | G |  | H |  | I |  | J |  | K |  | L |  | M |  | N |  | O |  | P |  | Q |  | R |  | S |  | T |  | U |  | V |  | W |  | X |  | Y |  | Z |  | AA |  | AB |  | AC |  | AD |  | AE |  | AF |  | AG |  | AH |  | AI |  | AJ |  | AK |  | AL |  | AM |  | AN |  | AO |  | AP |  | AQ |  | AR |  | AS |  | AT |  | AU |  | AV |  | AW |  | AX |  | AY |  | AZ |  | BA |  | BB |  | BC |  | BD |  | BE |  | BF |  | BG |  | BH |  | BI |  | BJ |  | BK |  | BL |  | BM |  | BN |  | BO |  | BP |  | BQ |  | BR |  | BS |  | BT |  | BU |  | BV |  | BW |  | BX |  | BY |  | BZ |  | CA |  | CB |  | CC |  | CD |  | CE |  |
|  |  | D |  | E |  | F |  | G |  | H |  | I |  | J |  | K |  | L |  | M |  | N |  | O |  | P |  | Q |  | R |  | S |  | T |  | U |  | V |  | W |  | X |  | Y |  | Z |  | AA |  | AB |  | AC |  | AD |  | AE |  | AF |  | AG |  | AH |  | AI |  | AJ |  | AK |  | AL |  | AM |  | AN |  | AO |  | AP |  | AQ |  | AR |  | AS |  | AT |  | AU |  | AV |  | AW |  | AX |  | AY |  | AZ |  | BA |  | BB |  | BC |  | BD |  | BE |  | BF |  | BG |  | BH |  | BI |  | BJ |  | BK |  | BL |  | BM |  | BN |  | BO |  | BP |  | BQ |  | BR |  | BS |  | BT |  | BU |  | BV |  | BW |  | BX |  | BY |  | BZ |  | CA |  | CB |  | CC |  | CD |  | CE |  |
|  |  | D |  | E |  | F |  | G |  | H |  | I |  | J |  | K |  | L |  | M |  | N |  | O |  | P |  | Q |  | R |  | S |  | T |  | U |  | V |  | W |  | X |  | Y |  | Z |  | AA |  | AB |  | AC |  | AD |  | AE |  | AF |  | AG |  | AH |  | AI |  | AJ |  | AK |  | AL |  | AM |  | AN |  | AO |  | AP |  | AQ |  | AR |  | AS |  | AT |  | AU |  | AV |  | AW |  | AX |  | AY |  | AZ |  | BA |  | BB |  | BC |  | BD |  | BE |  | BF |  | BG |  | BH |  | BI |  | BJ |  | BK |  | BL |  | BM |  | BN |  | BO |  | BP |  | BQ |  | BR |  | BS |  | BT |  | BU |  | BV |  | BW |  | BX |  | BY |  | BZ |  | CA |  | CB |  | CC |  | CD |  | CE |  |
|  |  | D |  | E |  | F |  | G |  | H |  | I |  | J |  | K |  | L |  | M |  | N |  | O |  | P |  | Q |  | R |  | S |  | T |  | U |  | V |  | W |  | X |  | Y |  | Z |  | AA |  | AB |  | AC |  | AD |  | AE |  | AF |  | AG |  | AH |  | AI |  | AJ |  | AK |  | AL |  | AM |  | AN |  | AO |  | AP |  | AQ |  | AR |  | AS |  | AT |  | AU |  | AV |  | AW |  | AX |  | AY |  | AZ |  | BA |  | BB |  | BC |  | BD |  | BE |  | BF |  | BG |  | BH |  | BI |  | BJ |  | BK |  | BL |  | BM |  | BN |  | BO |  | BP |  | BQ |  | BR |  | BS |  | BT |  | BU |  | BV |  | BW |  | BX |  | BY |  | BZ |  | CA |  | CB |  | CC |  | CD |  | CE |  |
|  |  | D |  | E |  | F |  | G |  | H |  | I |  | J |  | K |  | L |  | M |  | N |  | O |  | P |  | Q |  | R |  | S |  | T |  | U |  | V |  | W |  | X |  | Y |  | Z |  | AA |  | AB |  | AC |  | AD |  | AE |  | AF |  | AG |  | AH |  | AI |  | AJ |  | AK |  | AL |  | AM |  | AN |  | AO |  | AP |  | AQ |  | AR |  | AS |  | AT |  | AU |  | AV |  | AW |  | AX |  | AY |  | AZ |  | BA |  | BB |  | BC |  | BD |  | BE |  | BF |  | BG |  | BH |  | BI |  | BJ |  | BK |  | BL |  | BM |  | BN |  | BO |  | BP |  | BQ |  | BR |  | BS |  | BT |  | BU |  | BV |  | BW |  | BX |  | BY |  | BZ |  | CA |  | CB |  | CC |  | CD |  | CE |  |
|  |  | D |  | E |  | F |  | G |  | H |  | I |  | J |  | K |  | L |  | M |  | N |  | O |  | P |  | Q |  | R |  | S |  | T |  | U |  | V |  | W |  | X |  | Y |  | Z |  | AA |  | AB |  | AC |  | AD |  | AE |  | AF |  | AG |  | AH |  | AI |  | AJ |  | AK |  | AL |  | AM |  | AN |  | AO |  | AP |  | AQ |  | AR |  | AS |  | AT |  | AU |  | AV |  | AW |  | AX |  | AY |  | AZ |  | BA |  | BB |  | BC |  | BD |  | BE |  | BF |  | BG |  | BH |  | BI |  | BJ |  | BK |  | BL |  | BM |  | BN |  | BO |  | BP |  | BQ |  | BR |  | BS |  | BT |  | BU |  | BV |  | BW |  | BX |  | BY |  | BZ |  | CA |  | CB |  | CC |  | CD |  | CE |  |
|  |  | D |  | E |  | F |  | G |  | H |  | I |  | J |  | K |  | L |  | M |  | N |  | O |  | P |  | Q |  | R |  | S |  | T |  | U |  | V |  | W |  | X |  | Y |  | Z |  | AA |  | AB |  | AC |  | AD |  | AE |  | AF |  | AG |  | AH |  | AI |  | AJ |  | AK |  | AL |  | AM |  | AN |  | AO |  | AP |  | AQ |  | AR |  | AS |  | AT |  | AU |  | AV |  | AW |  | AX |  | AY |  | AZ |  | BA |  | BB |  | BC |  | BD |  | BE |  | BF |  | BG |  | BH |  | BI |  | BJ |  | BK |  | BL |  | BM |  | BN |  | BO |  | BP |  | BQ |  | BR |  | BS |  | BT |  | BU |  | BV |  | BW |  | BX |  | BY |  | BZ |  | CA |  | CB |  | CC |  | CD |  | CE |  |
|  |  | D |  | E |  | F |  | G |  | H |  | I |  | J |  | K |  | L |  | M |  | N |  | O |  | P |  | Q |  | R |  | S |  | T |  | U |  | V |  | W |  | X |  | Y |  | Z |  | AA |  | AB |  | AC |  | AD |  | AE |  | AF |  | AG |  | AH |  | AI |  | AJ |  | AK |  | AL |  | AM |  | AN |  | AO |  | AP |  | AQ |  | AR |  | AS |  | AT |  | AU |  | AV |  | AW |  | AX |  | AY |  | AZ |  | BA |  | BB |  | BC |  | BD |  | BE |  | BF |  | BG |  | BH |  | BI |  | BJ |  | BK |  | BL |  | BM |  | BN |  | BO |  | BP |  | BQ |  | BR |  | BS |  | BT |  | BU |  | BV |  | BW |  | BX |  | BY |  | BZ |  | CA |  | CB |  | CC |  | CD |  | CE |  |
|  |  | D |  | E |  | F |  | G |  | H |  | I |  | J |  | K |  | L |  | M |  | N |  | O |  | P |  | Q |  | R |  | S |  | T |  | U |  | V |  | W |  | X |  | Y |  | Z |  | AA |  | AB |  | AC |  | AD |  | AE |  | AF |  | AG |  | AH |  | AI |  | AJ |  | AK |  | AL |  | AM |  | AN |  | AO |  | AP |  | AQ |  | AR |  | AS |  | AT |  | AU |  | AV |  | AW |  | AX |  | AY |  | AZ |  | BA |  | BB |  | BC |  | BD |  | BE |  | BF |  | BG |  | BH |  | BI |  | BJ |  | BK |  | BL |  | BM |  | BN |  | BO |  | BP |  | BQ |  | BR |  | BS |  | BT |  | BU |  | BV |  | BW |  | BX |  | BY |  | BZ |  | CA |  | CB |  | CC |  | CD |  | CE |  |
|  |  | D |  | E |  | F |  | G |  | H |  | I |  | J |  | K |  | L |  | M |  | N |  | O |  | P |  | Q |  | R |  | S |  | T |  | U |  | V |  | W |  | X |  | Y |  | Z |  | AA |  | AB |  | AC |  | AD |  | AE |  | AF |  | AG |  | AH |  | AI |  | AJ |  | AK |  | AL |  | AM |  | AN |  | AO |  | AP |  | AQ |  | AR |  | AS |  | AT |  | AU |  | AV |  | AW |  | AX |  | AY |  | AZ |  | BA |  | BB |  | BC |  | BD |  | BE |  | BF |  | BG |  | BH |  | BI |  | BJ |  | BK |  | BL |  | BM |  | BN |  | BO |  | BP |  | BQ |  | BR |  | BS |  | BT |  | BU |  | BV |  | BW |  | BX |  | BY |  | BZ |  | CA |  | CB |  | CC |  | CD |  | CE |  |
|  |  | D |  | E |  | F |  | G |  | H |  | I |  | J |  | K |  | L |  | M |  | N |  | O |  | P |  | Q |  | R |  | S |  | T |  | U |  | V |  | W |  | X |  | Y |  | Z |  | AA |  | AB |  | AC |  | AD |  | AE |  | AF |  | AG |  | AH |  | AI |  | AJ |  | AK |  | AL |  | AM |  | AN |  | AO |  | AP |  | AQ |  | AR |  | AS |  | AT |  | AU |  | AV |  | AW |  | AX |  | AY |  | AZ |  | BA |  | BB |  | BC |  | BD |  | BE |  | BF |  | BG |  | BH |  | BI |  | BJ |  | BK |  | BL |  | BM |  | BN |  | BO |  | BP |  | BQ |  | BR |  | BS |  | BT |  | BU |  | BV |  | BW |  | BX |  | BY |  | BZ |  | CA |  | CB |  | CC |  | CD |  | CE |  |
|  |  | D |  | E |  | F |  | G |  | H |  | I |  | J |  | K |  | L |  | M |  | N |  | O |  | P |  | Q |  | R |  | S |  | T |  | U |  | V |  | W |  | X |  | Y |  | Z |  | AA |  | AB |  | AC |  | AD |  | AE |  | AF |  | AG |  | AH |  | AI |  | AJ |  | AK |  | AL |  | AM |  | AN |  | AO |  | AP |  | AQ |  | AR |  | AS |  | AT |  | AU |  | AV |  | AW |  | AX |  | AY |  | AZ |  | BA |  | BB |  | BC |  | BD |  | BE |  | BF |  | BG |  | BH |  | BI |  | BJ |  | BK |  | BL |  | BM |  | BN |  | BO |  | BP |  | BQ |  | BR |  | BS |  | BT |  | BU |  | BV |  | BW |  | BX |  | BY |  | BZ |  | CA |  | CB |  | CC |  | CD |  | CE |  |
|  |  | D |  | E |  | F |  | G |  | H |  | I |  | J |  | K |  | L |  | M |  | N |  | O |  | P |  | Q |  | R |  | S |  | T |  | U |  | V |  | W |  | X |  | Y |  | Z |  | AA |  | AB |  | AC |  | AD |  | AE |  | AF |  | AG |  | AH |  | AI |  | AJ |  | AK |  | AL |  | AM |  | AN |  | AO |  | AP |  | AQ |  | AR |  | AS |  | AT |  | AU |  | AV |  | AW |  | AX |  | AY |  | AZ |  | BA |  | BB |  | BC |  | BD |  | BE |  | BF |  | BG |  | BH |  | BI |  | BJ |  | BK |  | BL |  | BM |  | BN |  | BO |  | BP |  | BQ |  | BR |  | BS |  | BT |  | BU |  | BV |  | BW |  | BX |  | BY |  | BZ |  | CA |  | CB |  | CC |  | CD |  | CE |  |
|  |  | D |  | E |  | F |  | G |  | H |  | I |  | J |  | K |  | L |  | M |  | N |  | O |  | P |  | Q |  | R |  | S |  | T |  | U |  | V |  | W |  | X |  | Y |  | Z |  | AA |  | AB |  | AC |  | AD |  | AE |  | AF |  | AG |  | AH |  | AI |  | AJ |  | AK |  | AL |  | AM |  | AN |  | AO |  | AP |  | AQ |  | AR |  | AS |  | AT |  | AU |  | AV |  | AW |  | AX |  | AY |  | AZ |  | BA |  | BB |  | BC |  | BD |  | BE |  | BF |  | BG |  | BH |  | BI |  | BJ |  | BK |  | BL |  | BM |  | BN |  | BO |  | BP |  | BQ |  | BR |  | BS |  | BT |  | BU |  | BV |  | BW |  | BX |  | BY |  | BZ |  | CA |  | CB |  | CC |  | CD |  | CE |  |
|  |  | D |  | E |  | F |  | G |  | H |  | I |  | J |  | K |  | L |  | M |  | N |  | O |  | P |  | Q |  | R |  | S |  | T |  | U |  | V |  | W |  | X |  | Y |  | Z |  | AA |  | AB |  | AC |  | AD |  | AE |  | AF |  | AG |  | AH |  | AI |  | AJ |  | AK |  | AL |  | AM |  | AN |  | AO |  | AP |  | AQ |  | AR |  | AS |  | AT |  | AU |  | AV |  | AW |  | AX |  | AY |  | AZ |  | BA |  | BB |  | BC |  | BD |  | BE |  | BF |  | BG |  | BH |  | BI |  | BJ |  | BK |  | BL |  | BM |  | BN |  | BO |  | BP |  | BQ |  | BR |  | BS |  | BT |  | BU |  | BV |  |    |  |    |  |    |  |    |  |    |  |    |  |    |  |    |  |    |  |
